# Supplementary material
Source: publisher figshare collection journal article supplement (https://acs.figshare.com/ndownloader/files/4403044)

# Immortal CO<sub>2</sub>/Propylene Oxide Copolymerization: Precise Control of Molecular Weight and Architecture of Various Block Copolymers

Anish Cyriac, Sang Hwan Lee, Jobi Kodiyan Varghese, Eun Seok Park, Ji Hae Park, and Bun Yeoul Lee\*

Department of Molecular Science and Technology, Ajou University, Suwon 443-749 Korea

## Supporting Information

**General remarks.** CO<sub>2</sub> gas (99.999% purity) was dried through storage in a column of molecular sieves 3A at a pressure of 30 bar. Propylene oxide (PO) was dried by stirring over CaH<sub>2</sub> and then vacuum-transferred to reservoir. The <sup>1</sup>H NMR (400 MHz) was recorded on a Varian Mercury Plus 400. The gel permeation chromatograms (GPC) were obtained in THF at 35°C using a Waters Millennium apparatus with polystyrene standards. The T<sub>g</sub> data were determined from a second heating at a heating rate of 10°C/min with DSC (Differential Scanning Calorimetry). The tensile testbars (45 mm × 7.0 mm × 1.0 mm) were prepared by pressing polymer lump with screw at 120°C overnight between two plates that were spaced with a spacer of 1.0 mm thickness. The tensile tests were performed according to the ASTM D 638 on UTM (WL2100). The drawing rate was 5 mm/min. All the chain transfer agents except polystyrene carboxylic acid were purchased from Aldrich. Polystyrene carboxylic acid was prepared according to the literature method (H. Zhao, S. Liu, M. Jiang, X. Yuan, Y. An, L. Liu, *Polymer* **2000**, *41*, 2705).

**Synthesis of Complex 3.** To a flask containing compound **2** (0.302 g, 0.166 mmol) and AgNO<sub>3</sub> (0.113 g, 0.665 mmol), ethanol (5 mL) was added rapidly with stirring inside a glove box. AgI precipitated, which was filtered off over Celite after overnight stirring. Solvent was removed under vacuum to yield a yellow residue, which was dissolved in CH<sub>2</sub>Cl<sub>2</sub> (3 mL) and then filtered again to remove some residual AgI. Cobalt(II) acetate (0.029 g, 0.166 mmol) was added and the resulting solution was stirred under air for 1 day in the presence of molecular sieves (0.350 g). It was filtered over Celite and solvent was removed under reduced pressure to give a dark brown powder in quantitative yield. Two sets of signals were observed in 5:2 ratio in the <sup>1</sup>H NMR spectrum in dmsO-d<sub>6</sub> at 38°C. A major set indicated that the complex adopted a dissymmetric structure which might be assignable to **3-A** shown below. The other minor

set was assignable to symmetric **3-B**. The complex was paramagnetic in  $\text{CD}_2\text{Cl}_2$  and  $\text{THF-d}_8$ , and unassignable broad signals were observed in those solvents.  $^1\text{H}$  NMR ( $\text{dmsO-d}_6$ ,  $38^\circ\text{C}$ ) data for the major set:  $\delta$  7.87 (s, 2H,  $\text{CH}=\text{N}$ ) 7.31 and 7.29 (br s, 2H, m-H), 7.19 and 7.21 (br s, 2H, m-H), 3.83 and 3.57 (br, 2H, cyclohexyl-CH), 3.17-2.99 (br, 32H,  $\text{NCH}_2$ ), 2.58 and 2.54 (s, 6H,  $\text{CH}_3$ ), 2.08-1.82 (br, 4H, cyclohexyl- $\text{CH}_2$ ), 1.66-1.22 (br m, 74H), 0.88-0.84 (br, 36H,  $\text{CH}_3$ ) ppm.  $^1\text{H}$  NMR ( $\text{dmsO-d}_6$ ,  $38^\circ\text{C}$ ) data for the minor set:  $\delta$  8.02 (s, 2H,  $\text{CH}=\text{N}$ ) 7.46 (s, 2H, m-H), 7.35 (s, 2H, m-H), 3.55 (br, 2H, cyclohexyl-CH), 3.17-2.99 (br, 32H,  $\text{NCH}_2$ ), 2.64 (s, 6H,  $\text{CH}_3$ ), 2.08-1.82 (br, 4H, cyclohexyl- $\text{CH}_2$ ), 1.66-1.22 (br m, 74H), 0.88-0.84 (br, 36H,  $\text{CH}_3$ ) ppm.

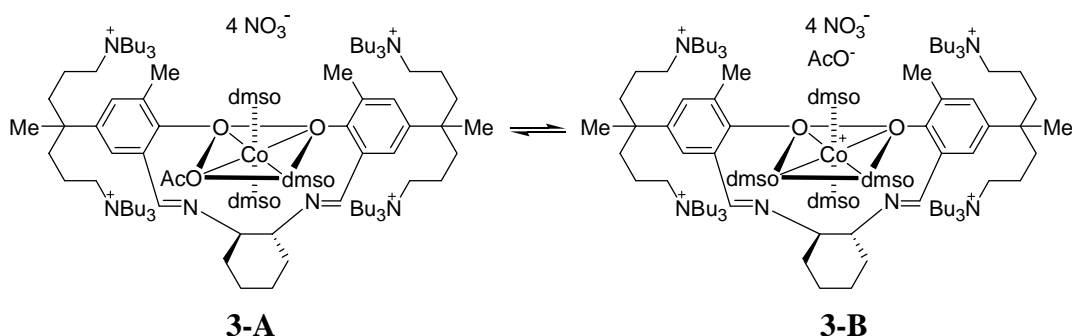

**A typical polymerization in the presence of chain transfer agent.** Bomb reactor was assembled inside a glove box after **3** (3.0 mg,  $1.80\ \mu\text{mol}$ ), PO (10 g,  $170\ \text{mmol}$ ), and adipic acid (0.131 g,  $900\ \mu\text{mol}$ ) were charged. The  $\text{CO}_2$  gas was pressurized to 15 bar, then the reactor was immersed in an  $75^\circ\text{C}$  oil bath. After 50 minutes, the solution temperature reached  $\sim 73^\circ\text{C}$  and the pressure started to drop. During this heating time, negligible amount of polymer was generated. Therefore, the heating time of 50 minutes was not included in the polymerization time. The polymerization was performed for 1 hour after the initiation, and a total 3-4 bar pressure drop was observed. The reactor was cooled to room temperature through immersion in an ice bath. After  $\text{CO}_2$  gas was released, the reactor was opened. The polymer solution was filtered over a short pad of silica gel and washed with methylene chloride (10 mL) to give a colorless solution. All volatiles were removed using a rotary evaporator to give a white residue. In the  $^1\text{H}$  NMR spectra, cyclic carbonate was observed with less than 5% selectivity, which was completely removed by evacuation in a vacuum oven at  $150^\circ\text{C}$  for several hours. The dissociated polymer chains are the ones containing -OH group at the end, from which the unzipping reaction generating cyclic carbonate is sluggish at the polymerization temperature of  $70\text{--}80^\circ\text{C}$ .

**Polyurethane formation.** To a 50 mL flask containing low molecular weight PPC-diol prepared using  $900\ \mu\text{mol}$  adipic acid (absolute- $M_n$ , 2200) was added equimolar amount of 4,4'-methylenebis(phenyl isocyanate) (0.224 g,  $900\ \mu\text{mol}$ ). Anhydrous THF (5 mL) was added to make a homogeneous solution.

After THF was completely removed using a vacuum line, the viscous residue was kept overnight at 100°C under N<sub>2</sub> atmosphere.

**Table S1.** CO<sub>2</sub>/propylene oxide copolymerization results in the presence of various chain transfer agents

(AH<sub>f</sub>).<sup>[a]</sup>

| PPC       | [AH <sub>f</sub> ]/[ <b>3</b> ] | Measured<br>$M_n$ <sup>[b]</sup> | $M_w/M_n$ | TON <sup>[c]</sup> | Absolute<br>$M_n$ <sup>[d]</sup> | Calculated<br>$M_n$ <sup>[e]</sup> | T <sub>g</sub> <sup>[f]</sup><br>(°C) |
|-----------|---------------------------------|----------------------------------|-----------|--------------------|----------------------------------|------------------------------------|---------------------------------------|
| <b>15</b> | 300                             | 5000                             | 1.05      | 11500              | 4600                             | 2700                               | 31                                    |
| <b>16</b> | 300                             | 5500                             | 1.04      | 9700               | 3200                             | 3000                               | 29                                    |
| <b>17</b> | 300                             | 5200                             | 1.03      | 9300               | 3100                             | 2900                               | 28                                    |
| <b>18</b> | 300                             | 3100                             | 1.07      | 9500               | 3200                             | 1600 <sup>[g]</sup>                | 28                                    |
| <b>19</b> | 300                             | 5300                             | 1.05      | 9900               | 3300                             | 2900                               | 30                                    |
| <b>20</b> | 300                             | 6600                             | 1.04      | 10900              | 3600                             | 3700                               | 32                                    |
| <b>21</b> | 600                             | 3800                             | 1.06      | 13000              | 2200                             | 2000                               | 21                                    |
| <b>22</b> | 600                             | 4500                             | 1.05      | 16200              | 2700                             | 2400                               | 28                                    |
| <b>23</b> | 200                             | 6200                             | 1.04      | 8100               | 4100                             | 3600                               | 29                                    |
| <b>24</b> | 200                             | 5200                             | 1.04      | 9500               | 4700                             | 2900                               | 33                                    |
| <b>25</b> | 150                             | 4200                             | 1.03      | 9200               | 6100                             | 2300                               | 21                                    |

<sup>[a]</sup>Polymerization condition: PO (10 g, 170 mmol), **3** (3.0 mg, [PO]/[Cat] = 100000), CO<sub>2</sub> pressure (25 bar), temperature (75°C), reaction time (60 minutes). <sup>[b]</sup>Determined on GPC using polystyrene standards. <sup>[c]</sup>Turnover number calculated based on the weight of the isolated polymers. <sup>[d]</sup>Calculated from an equation of " $M_n = \{TON \times 102.13\} / \{[AH_f]/[3] + 5\}$ ". <sup>[e]</sup>Calculated from an equation of " $M_n = 0.255 \times [GPC\text{-measured } M_n]^{1.09}$ ". <sup>[f]</sup>Glass transition temperature measured on DSC. <sup>[g]</sup>Low value may be due to water impurities present in highly hygroscopic diethylene glycol.

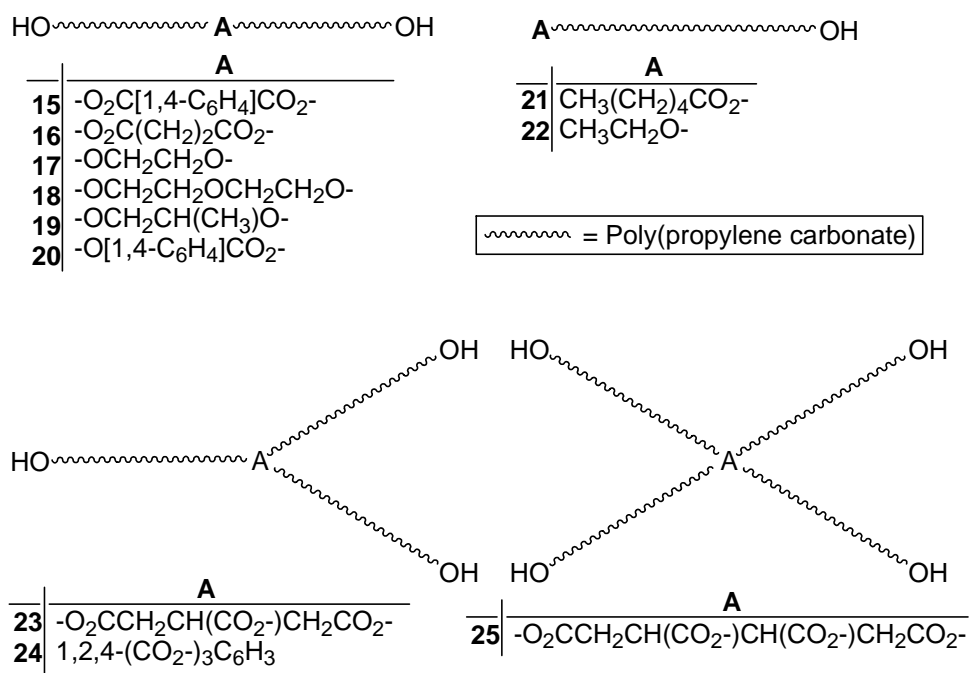

**Table S2.** Additional data for Table 2<sup>[a]</sup>

| entry | Polymer   | $M_n$ of -A- | w% of -A- <sup>[b]</sup> | [OH or CO <sub>2</sub> H] / [3] | TON <sup>[c]</sup> | $M_n$ <sup>[d]</sup> ( $\times 10^{-3}$ ) | $M_w/M_n$ | T <sub>g</sub> <sup>[e]</sup> (°C) | T <sub>m</sub> <sup>[e]</sup> (°C) |
|-------|-----------|--------------|--------------------------|---------------------------------|--------------------|-------------------------------------------|-----------|------------------------------------|------------------------------------|
| 1     | <b>4</b>  | 2000         | 8.2                      | 108                             | 12200              | 19                                        | 1.30      | 27                                 |                                    |
| 2     | <b>4</b>  | 2000         | 47                       | 542                             | 6200               | 6.1                                       | 1.05      | -19                                |                                    |
| 3     | <b>4</b>  | 10000        | 12                       | 22                              | 7600               | 68                                        | 1.48      | 26                                 |                                    |
| 4     | <b>4</b>  | 10000        | 39                       | 111                             | 8600               | 22                                        | 1.19      | -12                                | 51                                 |
| 5     | <b>5</b>  | 3500         | 12.4                     | 112                             | 13600              | 23                                        | 1.27      | 36                                 |                                    |
| 6     | <b>6</b>  | 2900         | 8.3                      | 100                             | 15700              | 34                                        | 1.13      | 37                                 |                                    |
| 7     | <b>7</b>  | 2500         | 9.2                      | 90                              | 11900              | 45                                        | 1.09      | 35                                 |                                    |
| 8     | <b>8</b>  | 2000         | 7.6                      | 139                             | 15900              | 32                                        | 1.07      | 31                                 |                                    |
| 9     | <b>9</b>  | 2000         | 9.2                      | 112                             | 11900              | 24                                        | 1.07      | 31                                 |                                    |
| 10    | <b>10</b> | 35000        | 8.3                      | 4                               | 15100              | 111                                       | 1.57      | 39                                 | 53                                 |
| 11    | <b>10</b> | 35000        | 20                       | 8                               | 9100               | 54                                        | 1.19      | 27                                 | 55                                 |
| 12    | <b>11</b> | 700          | 5.5                      | 80                              | 9900               | 19                                        | 1.18      | 37                                 | 92                                 |
| 13    | <b>11</b> | 700          | 17                       | 397                             | 13500              | 7.8                                       | 1.18      | 34                                 | 96                                 |
| 14    | <b>11</b> | 700          | 39                       | 794                             | 8600               | 3.5                                       | 1.45      | 26                                 | 103                                |
| 15    | <b>12</b> | 43000        | 11                       | 3                               | 11500              | 123                                       | 1.43      | 42, 102                            |                                    |
| 16    | <b>12</b> | 43000        | 22                       | 6                               | 9700               | 114                                       | 1.50      | 43, 108                            |                                    |
| 17    | <b>13</b> | 6400         | 9.7                      | 18                              | 11200              | 12                                        | 2.23      | 37                                 |                                    |
| 18    | <b>13</b> | 6400         | 20.6                     | 36                              | 8500               | 71                                        | 1.93      | 41                                 |                                    |
| 19    | <b>14</b> | 1400         | 10                       | 78                              | 10700              | 38                                        | 1.79      | 37                                 | 79                                 |
| 20    | <b>14</b> | 1400         | 22                       | 231                             | 11500              | 22                                        | 1.58      | 33                                 | 87                                 |

<sup>[a]</sup>Polymerization condition: PO (10 g, 170 mmol), **3** (3.0 mg, [PO]/[Cat] = 100000), CO<sub>2</sub> (25 bar), temperature (75°C), time (60 min). <sup>[b]</sup>[added -A- polymer]/[obtained block copolymer]×100. <sup>[c]</sup>Turnover number calculated based on the weight of the isolated pure polymers. <sup>[d]</sup>Determined on GPC using polystyrene standards. <sup>[e]</sup>Measured on DSC.

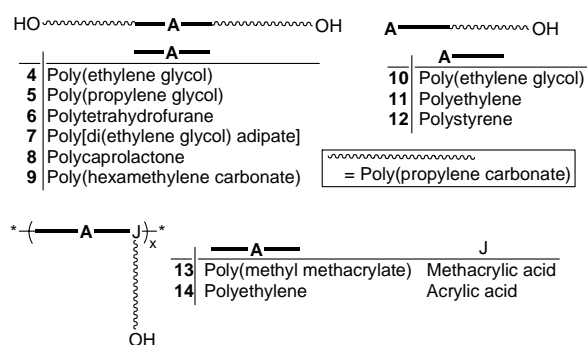

<Glass transition temperature ( $T_g$ ) of PPC-diol prepared using adipic acid as chain transfer agent (Table 1) versus the absolute- $M_n$ >

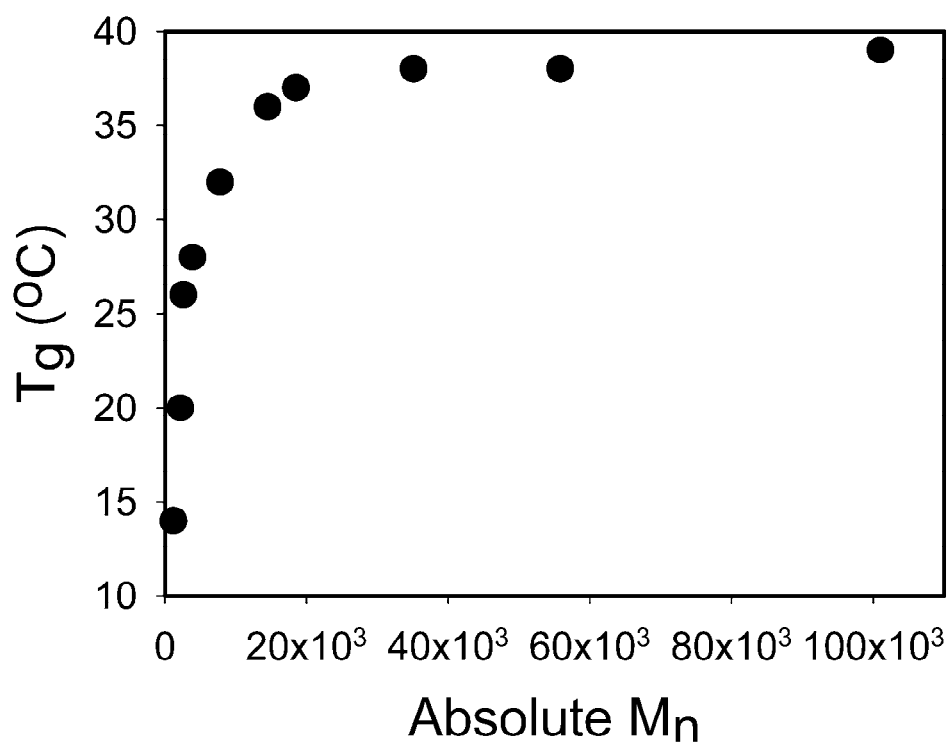

< $^1\text{H}$ -NMR spectrum of **3** in  $\text{dmsO-d}_6$  at  $38^\circ\text{C}$  (signals marked with "^" for the major set; signals marked with "\*" for the minor set)>

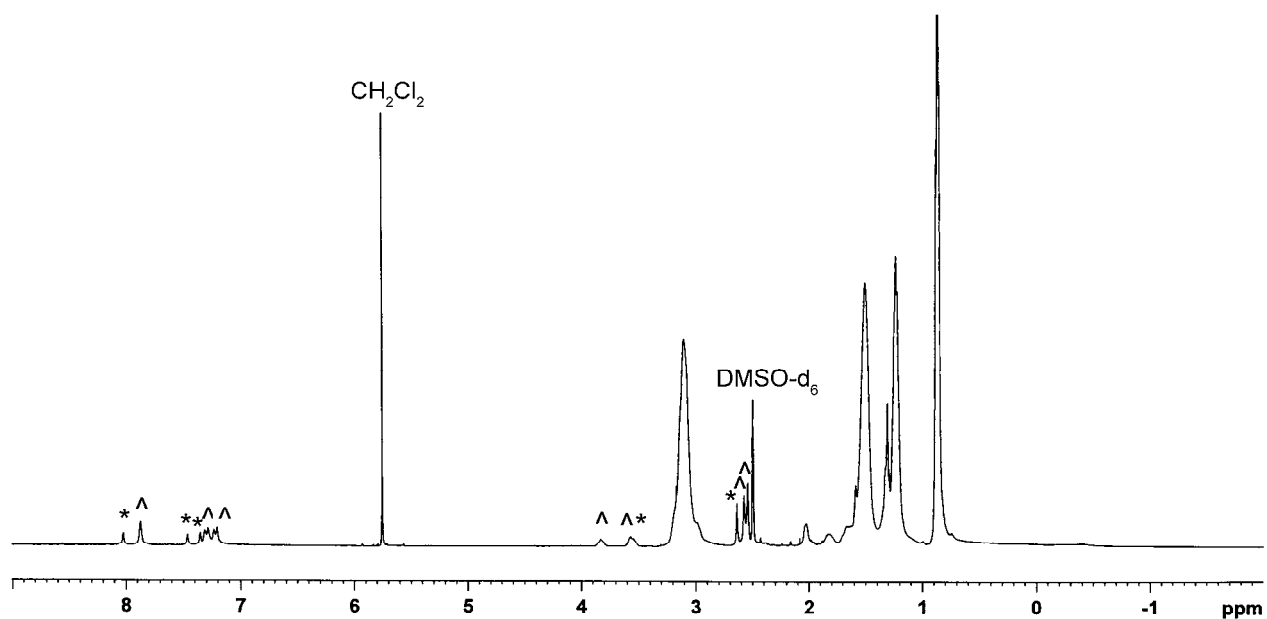

< $^1\text{H}$ -NMR of low molecular weight PPC-diol prepared using 500 equivalents of adipic acid (entry 9 in table 1)>

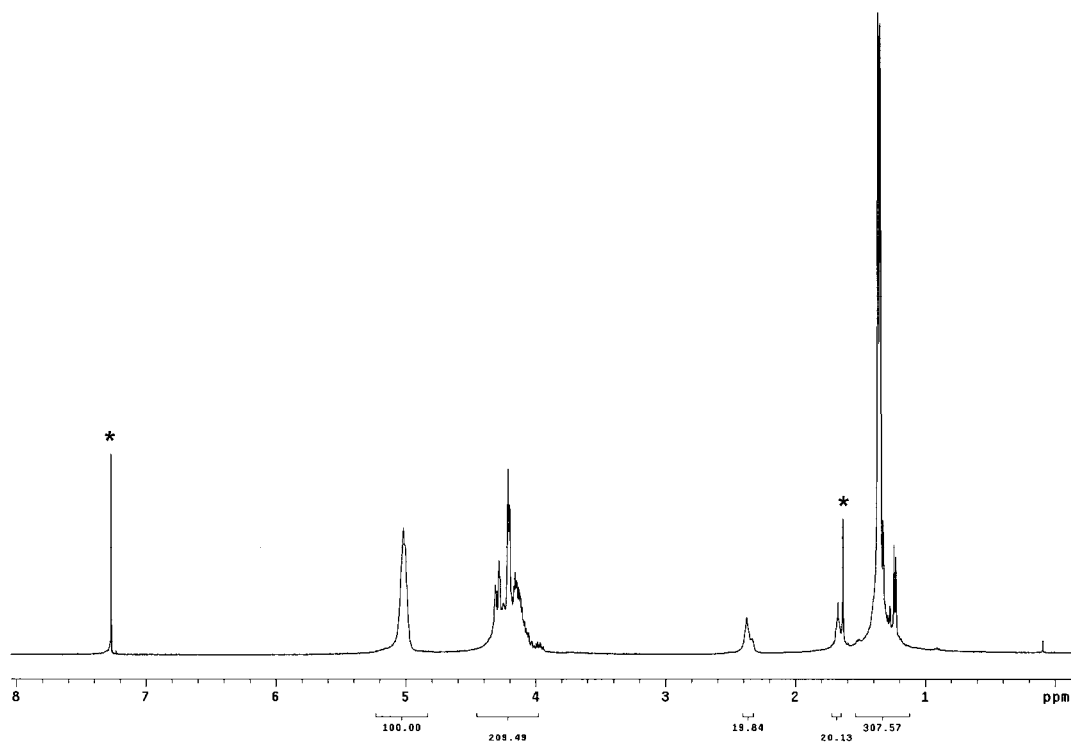

< $^1\text{H}$ -NMR spectrum of PPC-*block*-PEG (PEG, 20 w%) (entry 11 in table 2)>

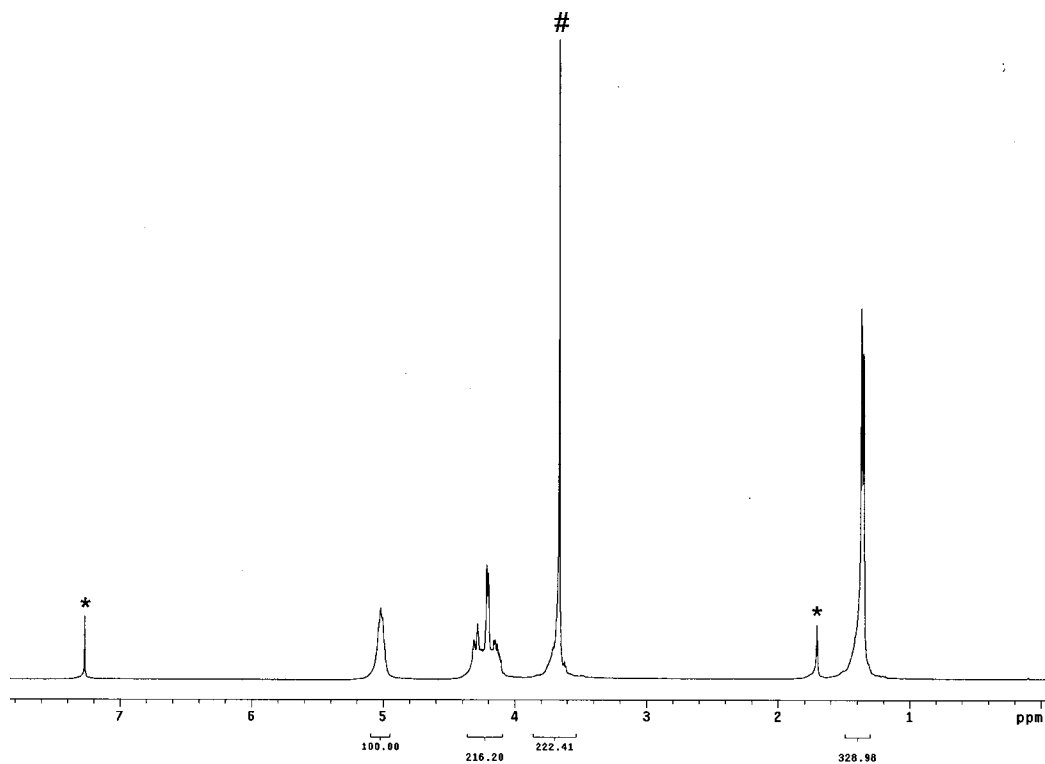

<<sup>1</sup>H-NMR spectrum of PPC-*block*-PS (PS, 22 w%) (entry 15 in table 2)>

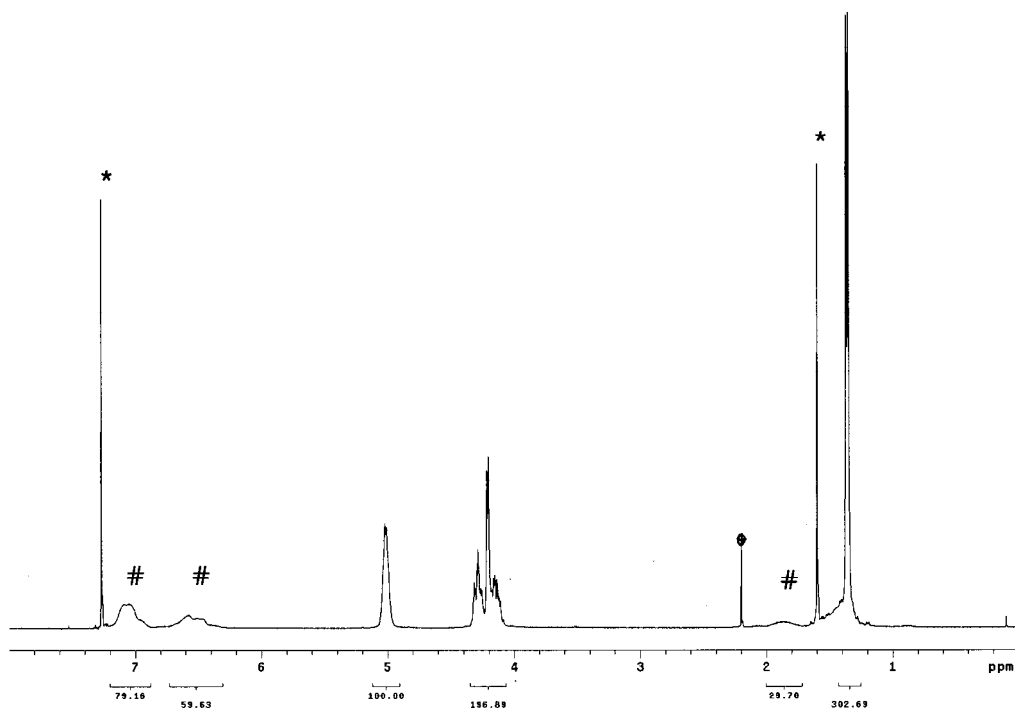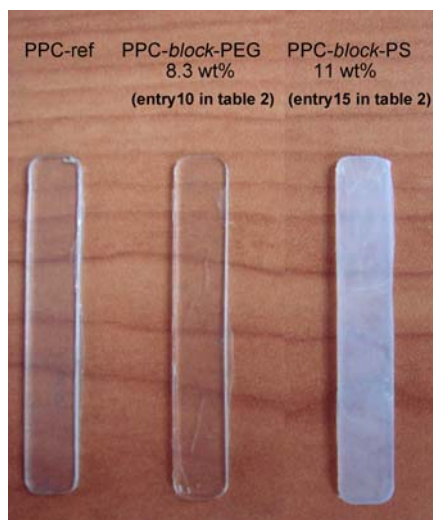

**Table S3.** Tensile Properties

| Sample                          | $M_n$<br>( $\times 10^{-3}$ ) | $M_w / M_n$ | Tensile<br>strength<br>(N/mm <sup>2</sup> ) | Stress<br>at break<br>(N) | Strain<br>at break<br>(%) | Modulus<br>(N/mm <sup>2</sup> ) |
|---------------------------------|-------------------------------|-------------|---------------------------------------------|---------------------------|---------------------------|---------------------------------|
| PPC-ref                         | 133                           | 1.28        | 3.0                                         | 32                        | 7                         | 1900                            |
| PPC- <i>block</i> -PEG (8.3 w%) | 111                           | 1.57        | 5.0                                         | 46                        | 770                       | 19                              |
| PPC- <i>block</i> -PS (11 w%)   | 123                           | 1.43        | 5.1                                         | 55                        | 7                         | 400                             |



<GPC curves of *block* copolymers (The signals marked with "\*" are the chains grown from nitrate or acetate anions in **3**)>

PPC-*block*-PEG-*block*-PPC

(entries 1-2 in Table 2)

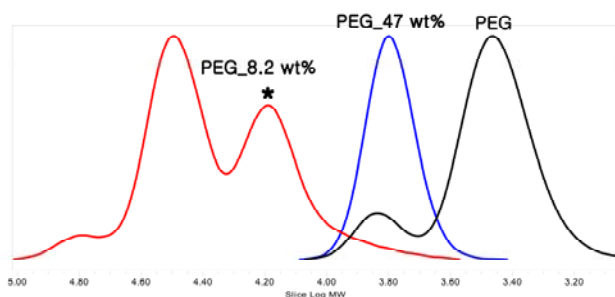

PPC-*block*-PEG-*block*-PPC

(entries 3-4 in Table 2)

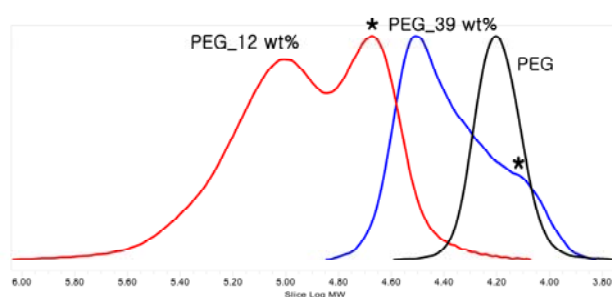

PPC-*block*-PPG-*block*-PPC

(entry 5 in Table 2)

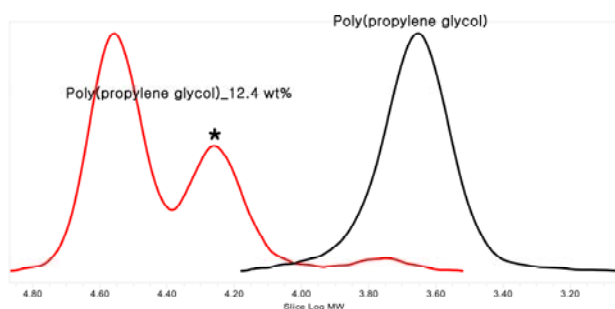

PPC-*block*-poly(THF)-*block*-PPC

(entry 6 in Table 2)

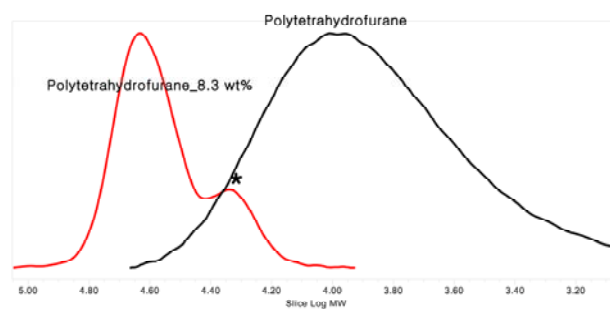

PPC-*block*-poly[di(ethylene glycol)adipate]-  
*block*-PPC

(entry 7 in Table 2)

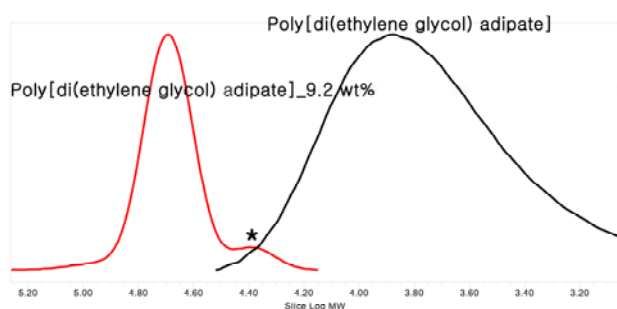

PPC-*block*-polycaprolactone-*block*-PPC

(entry 8 in Table 2)

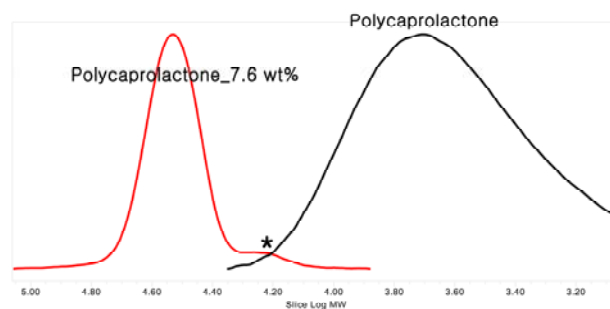

PPC-*block*-poly(hexamethylene carbonate)-  
*block*-PPC

(entry 9 in Table 2)

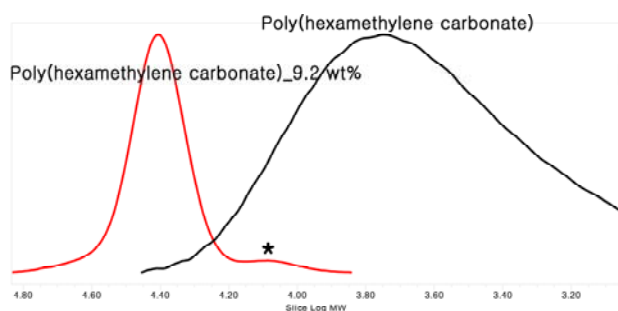

PPC-*block*-PEG  
(entries 10-11 in Table 2)

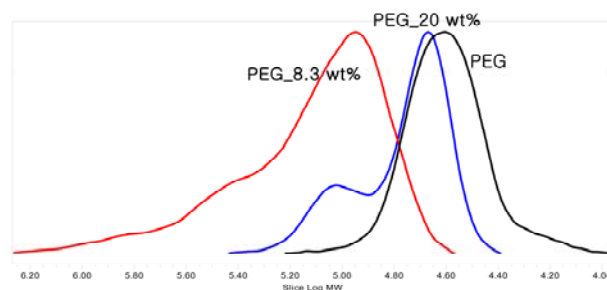

PPC-*block*-PE

(entries 12-14 in Table 2)

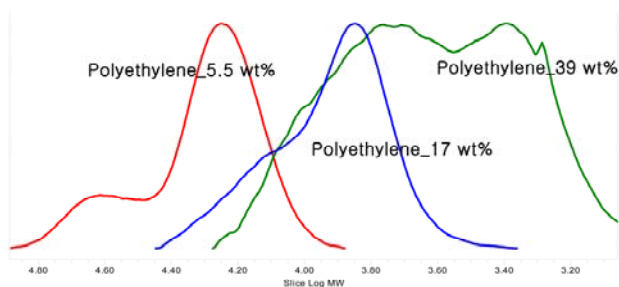

PPC-*block*-PS

(entries 15-16 in Table 2)

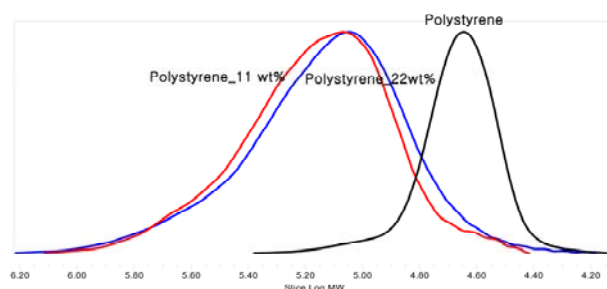

PMMA-*graft*-PPC

(entries 17-18 in Table 2)

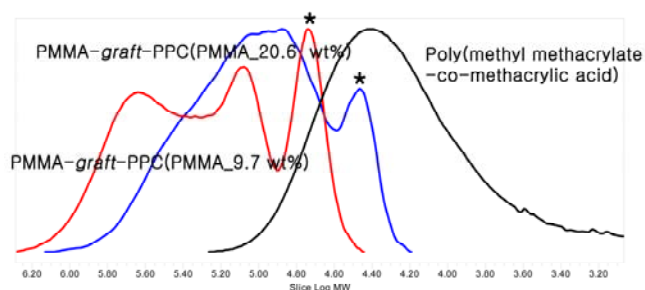

PE-*graft*-PPC

(entries 19-20 in Table 2)

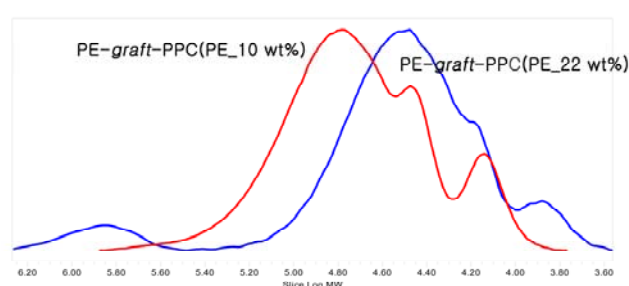

<DSC thermograms of *block* copolymers>

PPC-*block*-PEG-*block*-PPC

(entry 4 in Table 2)

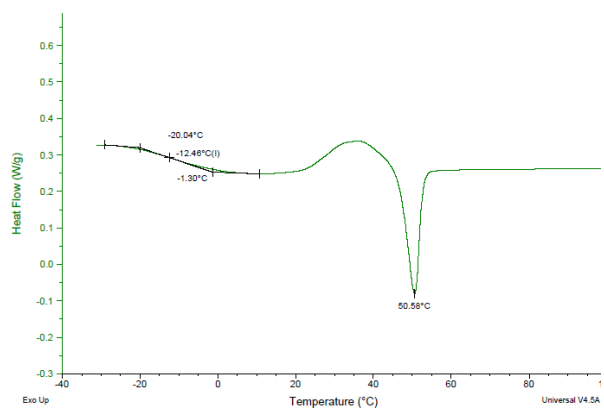

PPC-*block*-PEG

(entry 10 in Table 2)

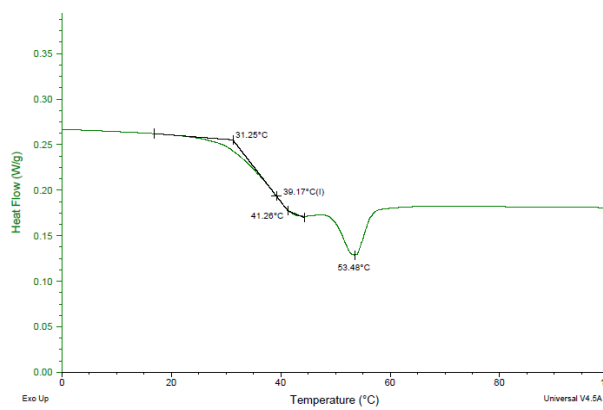

PPC-*block*-PEG

(entry 11 in Table 2)

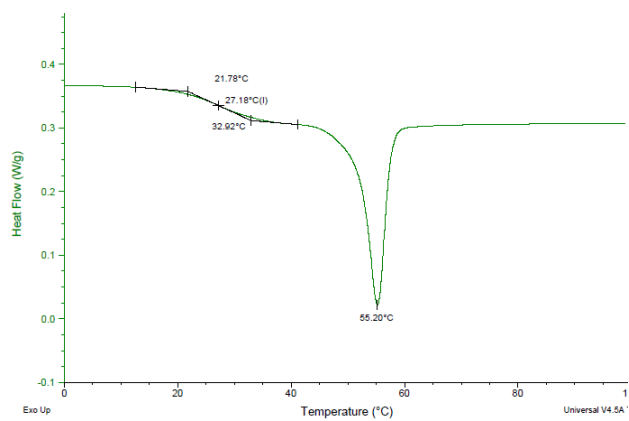

PPC-*block*-PE

(entry 12 in Table 2)

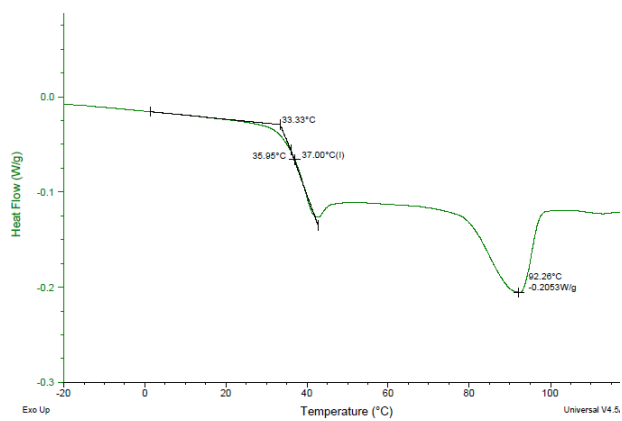

PPC-*block*-PE  
(entry 13 in Table 2)

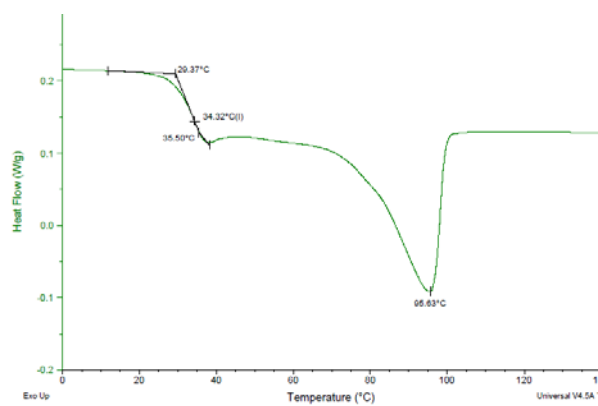

PPC-*block*-PE  
(entry 14 in Table 2)

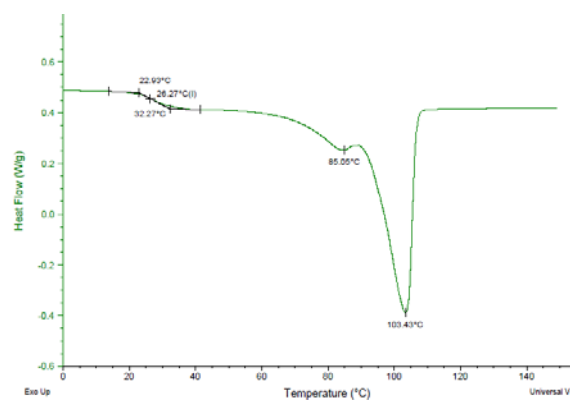

PPC-*block*-PS  
(entry 16 in Table 2)

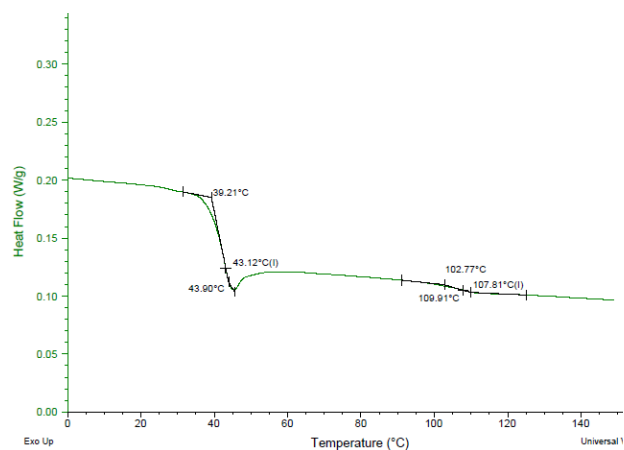

PE-*graft*-PPC  
(entry 19 in Table 2)

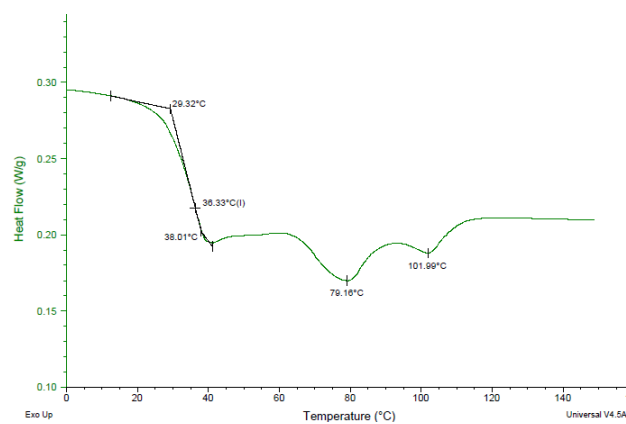

PE-*graft*-PPC  
(entry 20 in Table 2)

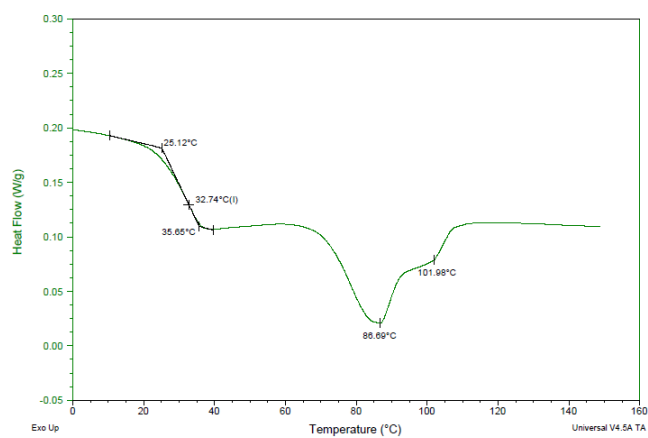

Supplement: Supplementary file 1 [file 4403044]
